# Supplementary material for: Phenotypic novelty in experimental hybrids is predicted by the genetic distance between species of cichlid fish
Source: Springer Nature journal article supplement (doi:10.1186/1471-2148-9-283), 2009-01-01

**a) *N. omni* x *P. pun***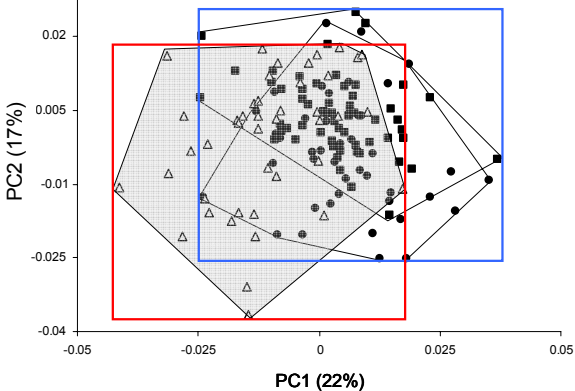**b) *P. chil* x *P. ny***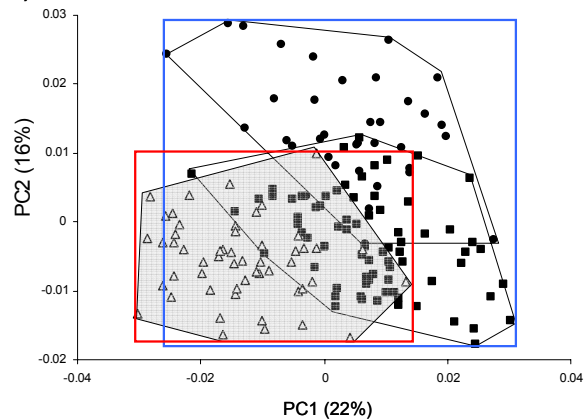**c) *M. est* x *A. call***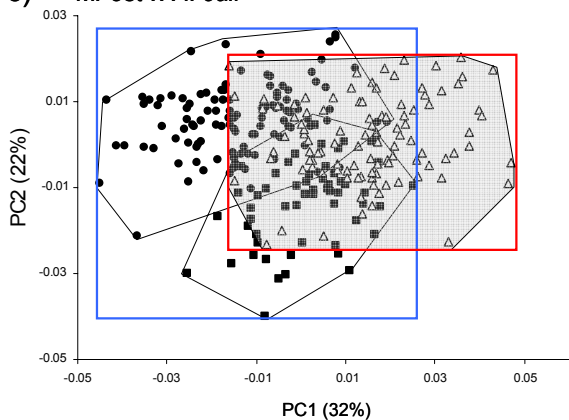**d) *P. taen* x *A. call***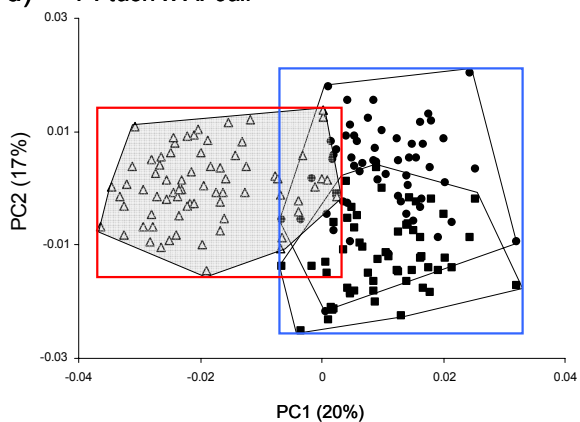**e) *A. burt* x *A. call***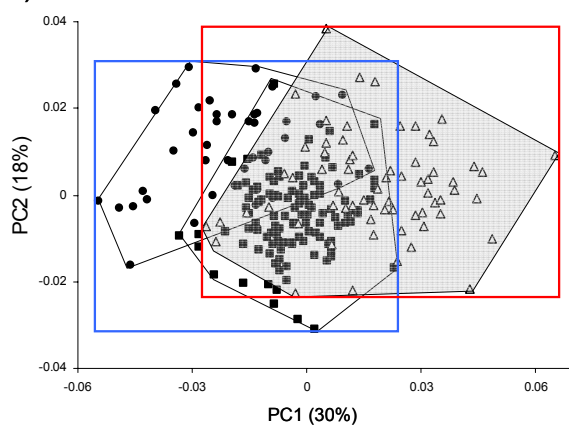**f) *P. ny* x *A. call***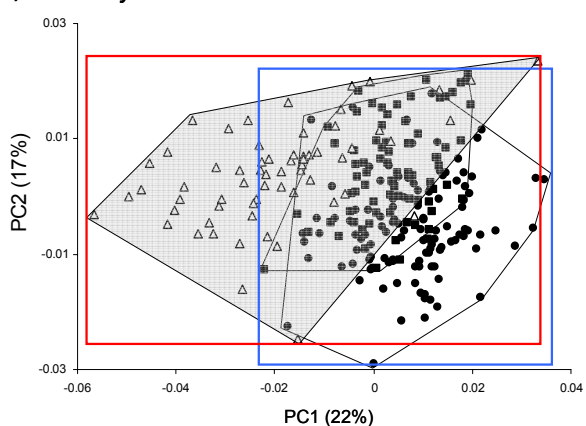

Supplement: 12862_2009_1197_MOESM5_ESM.pdf [file 12862_2009_1197_MOESM5_ESM.pdf]
