# Supplementary material for: Phenotypic novelty in experimental hybrids is predicted by the genetic distance between species of cichlid fish
Source: Springer Nature journal article supplement (doi:10.1186/1471-2148-9-283), 2009-01-01

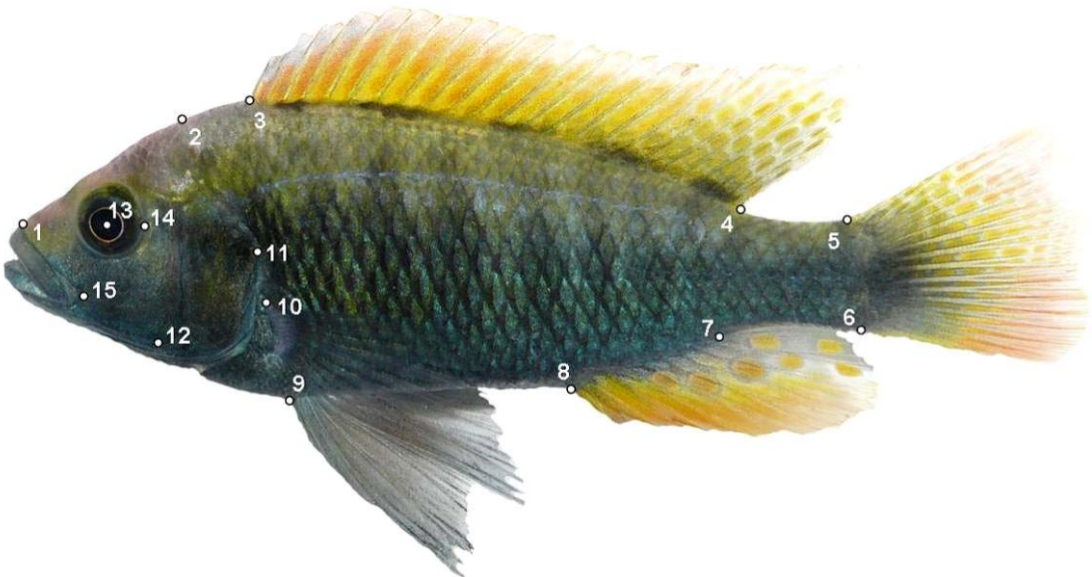

Supplement: 12862_2009_1197_MOESM8_ESM.pdf [file 12862_2009_1197_MOESM8_ESM.pdf]
